# Supplementary material
Source: PubMed Central journal article supplement (PMC6878193)
Supplement: NIHMS1539960-supplement-COA_form.pdf [file NIHMS1539960-supplement-COA_form.pdf]

## Change of Authorship Form

(Must be completed and signed by ALL authors)

Please check all that apply

New author(s) have been added (in addition to this form, all new authors must complete the copyright transfer agreement and conflict of interest disclosure.

Change in order of authorship.

An author wishes to remove his/her name. An author's name may only be removed his/her own request and a letter signed by the author should accompany this form

Manuscript Number 022184R1

Manuscript Title Associations between sleep disordered breathing and subclinical carotid atherosclerosis

### Former Authorship

Please list ALL AUTHORS in the same order as the original submission. For more than 12, use an extra sheet.

#### Print Name

Name (1) Ying Y Zhao  
 Name (2) Sogol Javaheri  
 Name (3) Rui Wang  
 Name (4) Brian B Koo  
 Name (5) James H Stein  
 Name (6) Claudia E Korcarz

#### Print Name

Name (7) Susan Redline  
 Name (8) \_\_\_\_\_  
 Name (9) \_\_\_\_\_  
 Name (10) \_\_\_\_\_  
 Name (11) \_\_\_\_\_  
 Name (12) \_\_\_\_\_

### New Authorship

All authors must sign below agreeing to the changes in authorship. The authorship order must reflect the authorship order of the manuscript.

|                                   |                                                                                                       |                           |
|-----------------------------------|-------------------------------------------------------------------------------------------------------|---------------------------|
| Name (1) <u>Ying Y Zhao</u>       | Signature <u>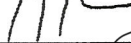</u>  | Date <u>March 6, 2019</u> |
| Name (2) <u>Sogol Javaheri</u>    | Signature <u></u> | Date <u>3/8/19</u>        |
| Name (3) <u>Rui Wang</u>          | Signature <u></u> | Date <u>3/7/2019</u>      |
| Name (4) <u>Na Guo</u>            | Signature <u></u>  | Date <u>3/8/2019</u>      |
| Name (5) <u>Brian B Koo</u>       | Signature <u></u> | Date <u>3/7/2019</u>      |
| Name (6) <u>James H Stein</u>     | Signature <u></u> | Date <u>3/8/19</u>        |
| Name (7) <u>Claudia E Korcarz</u> | Signature <u></u> | Date <u>3/6/19</u>        |
| Name (8) <u>Susan Redline</u>     | Signature <u></u> | Date <u>3/6/19</u>        |
| Name (9) _____                    | Signature _____                                                                                       | Date _____                |
| Name (10) _____                   | Signature _____                                                                                       | Date _____                |
| Name (11) _____                   | Signature _____                                                                                       | Date _____                |
| Name (12) _____                   | Signature _____                                                                                       | Date _____                |

Please scan and email to [stroke@strokeahajournal.org](mailto:stroke@strokeahajournal.org).
