# Supplementary material
Source: PubMed Central journal article supplement (PMC6878193)
Supplement: NIHMS1539960-supplement-Supplemental_Material.pdf [file NIHMS1539960-supplement-Supplemental_Material.pdf]

## **SUPPLEMENTAL MATERIAL**

**Associations between sleep apnea and subclinical carotid atherosclerosis: The Multi-Ethnic Study of Atherosclerosis**

Ying Y. Zhao, MD; Sogol Javaheri, MD; Rui Wang, PhD; Na Guo, MS; Brian B. Koo, MD; James H. Stein, MD; Claudia E. Korcarz, DVM; Susan Redline, MD, MPH

1. **Methods**
2. **Table I:** Baseline Characteristics by the Presence or Absence of Carotid Plaque
3. **Table II:** Sex-Specific Association between Sleep Apnea, Arousal Index, and the Presence of Carotid Plaque
4. **Table III:** Race/Ethnicity-Specific Association between Sleep Apnea, Arousal Index, and the Presence of Carotid Plaque
5. **Table IV:** Sex-Specific Association between Sleep Apnea, Arousal Index, and Carotid Intima-Media Thickness
6. **Table V:** Race/Ethnicity-Specific Association between Sleep Apnea, Arousal Index, and Carotid Intima-Media Thickness
7. **Table VI:** P-interactions between Demographics and Sleep Measures in Predicting Carotid Plaque Presence
8. **Table VII:** P-interactions between Demographics and Sleep Measures in Predicting Carotid Intima-Media Thickness

## **Methods**

### **Study Population**

The Multi-Ethnic Study of Atherosclerosis (MESA) is a prospective study designed to investigate risk factors for incident CVD and progression of subclinical CVD in an ethnically diverse population. Details of the study design have been published previously.<sup>1</sup> Between July 2000 and August 2002, 6,814 men and women aged 45 to 85 and free of clinically apparent CVD were recruited from six U.S. Centers: Baltimore, Maryland; Chicago, Illinois; Forsyth County, North Carolina; Los Angeles County, California; New York, New York; and St. Paul, Minnesota. At MESA Exam 5 (2010 to 2013), all active MESA participants not reporting regular use of oral appliances, nocturnal oxygen, or nightly positive airway pressure therapy were invited to participate in the MESA Sleep Study, which consisted of sleep questionnaire data, polysomnography and actigraphy. Of the 4,077 participants approached, 147 (6.5%) were ineligible (95 due to a history of positive airway pressure device use; 4 due to the use of an oral appliance; and 4 due to oxygen use) and 141 participants lived too far away to participate. Of the remaining 3,789 participants, 2,261 participated in the sleep exam (59.7%). Comparison of characteristics between sleep study participants and those who did not participate in the sleep examination showed that nonparticipants were slightly more likely to be White, older, current/ex-smokers, and to have hypertension and chronic obstructive pulmonary disease. However, there was no statistically significant difference in the prevalence of self-reported doctor-diagnosed sleep apnea. In total, 2,060 participants had successful polysomnography data. The present cohort consists of 1,615 participants with successful polysomnography and carotid ultrasound data at Exam 5.

### **Polysomnography**

Details of MESA polysomnography methodology have been published.<sup>2</sup> Briefly, in-home 15-channel polysomnography was conducted using the Somte device (Compumedics Ltd., Abbotsville, AU). The recording montage included electroencephalography, electrooculograms, chin electromyogram, bipolar electrocardiogram, thoracic and abdominal respiratory inductance plethysmography, airflow (by nasal-oral thermocouple and nasal pressure cannula), finger pulse oximetry, and limb movements. Sleep stages and arousals were scored by the Brigham and Women's Hospital Sleep Reading Center according to published guidelines<sup>3</sup> adapted from the Sleep Heart Health Study.<sup>4,5</sup> The arousal index was the number of cortical arousals per sleep hour and sleep was staged according to published guidelines and expressed as percentage time in each stage.<sup>6</sup> The intraclass correlation coefficients for AHI exceeded 0.95 and for arousal index exceeded 0.90.

### **Carotid Ultrasonography**

B-mode ultrasound images of the right and left common, bifurcation, and internal carotid artery (ICA) segments were recorded with a Logiq 700 ultrasound system using the M12L transducer (General Electric Medical Systems, 13 MHz transducer).<sup>7</sup> The intraclass correlation coefficients for inter- and intrareader reproducibility for CIMT was  $> 0.95$ ; for carotid plaque presence Kappa scores were 0.83 and 0.89, respectively.<sup>7</sup>

### **Other Measures**

Diabetes was defined as a fasting serum glucose level  $\geq 126$  mg/ml or diabetes medication use (oral antihyperglycemics or insulin) or hemoglobin A1C  $\geq 6.5\%$ . Hypertension was defined as an average seated systolic blood pressure  $\geq 140$  mmHg (average of 3 sets) or average seated diastolic blood pressure  $\geq 90$  mmHg or use of antihypertensive medication.

Self-reported snoring was obtained by sleep questionnaires. Participants were asked: (a) “Have you ever snored?” and, if yes, (b) “How often do you snore?” Habitual snoring was considered if participants reported snoring sometimes (3-5 nights/week) or always/almost always (6-7 nights/week).

Measured weight and height were used to calculate body mass index (BMI; weight in kilograms divided by height in meters squared), and categorized as  $<25$  (referent), 25-29.9, and  $\geq 30$  kg/m<sup>2</sup> to represent normal, overweight, and obese individuals, respectively.<sup>8</sup>

## References

1. Bild DE, Bluemke DA, Burke GL, Detrano R, Diez Roux AV, Folsom AR, et al. Multi-Ethnic Study of Atherosclerosis: objectives and design. *Am J Epidemiol* 2002;156:871-881.
2. Chen X, Wang R, Zee P, Lutsey PL, Javaheri S, Alcantara C, et al. Racial/ethnic differences in sleep disturbances: The Multi-Ethnic Study of Atherosclerosis (MESA). *Sleep* 2015;38:877-888.
3. Redline S, Budhiraja R, Kapur V, Marcus CL, Mateika JH, Mehra R, et al. The scoring of respiratory events in sleep: reliability and validity. *J Clin Sleep Med* 2007;3:169-200.
4. Whitney CW, Gottlieb DJ, Redline S, Norman RG, Dodge RR, Shahar E, et al. Reliability of scoring respiratory disturbance indices and sleep staging. *Sleep* 1998;21:749-757.
5. Redline S, Sanders MH, Lind BK, Quan SF, Iber C, Gottlieb DJ, et al. Methods for obtaining and analyzing unattended polysomnography data for a multicenter study. Sleep Heart Health Research Group. *Sleep* 1998;21:759-767.
6. Iber C A-IS, Chesson A, Quan S. The AASM Manual for the Scoring of Sleep and Associated Events: Rules, Terminology and Technical Specifications, 1<sup>st</sup> ed., Westchester, IL: American Academy of Sleep Medicine; 2007.
7. Tattersall MC, Gassett A, Korcarz CE, Gepner AD, Kaufman JD, Liu KJ, et al. Predictors of carotid thickness and plaque progression over a decade: The Multi-Ethnic Study of Atherosclerosis (MESA). *Stroke* 2014;45:3257-3262.
8. National Institutes of Health, National Heart, Lung, and Blood Institute. Clinical Guidelines on the Identification, Evaluation, and Treatment of Overweight and Obesity in Adults: The Evidence Report. Bethesda, MD: National Institutes of Health; 1998.

**Table I:** Baseline Characteristics by the Presence or Absence of Carotid Plaque

|                                           | <b>Total Sample<br/>N=1615</b> | <b>Carotid Plaque<br/>N=1073</b> | <b>No Carotid<br/>Plaque<br/>N=542</b> | <b>P value</b> |
|-------------------------------------------|--------------------------------|----------------------------------|----------------------------------------|----------------|
| Age (years)                               |                                |                                  |                                        |                |
| Mean $\pm$ SD                             | 68.7 $\pm$ 9.1                 | 70.3 $\pm$ 9.1                   | 65.4 $\pm$ 8.1                         | <0.0001        |
| Median [IQR]                              | 68.0 [61, 76]                  | 70.0 [63, 77]                    | 64.0 [59, 71]                          |                |
| Male, n (%)                               | 741 (45.9)                     | 506 (47.2)                       | 235 (43.4)                             | 0.1479         |
| Race, n (%)                               |                                |                                  |                                        | 0.0028         |
| White                                     | 573 (35.5)                     | 414 (38.6)                       | 159 (29.3)                             |                |
| Chinese                                   | 207 (12.8)                     | 128 (11.9)                       | 79 (14.6)                              |                |
| Black                                     | 447 (27.7)                     | 280 (26.1)                       | 167 (30.8)                             |                |
| Hispanic                                  | 388 (24.0)                     | 251 (23.4)                       | 137 (25.3)                             |                |
| BMI, kg/m <sup>2</sup>                    | 28.6 (5.5)                     | 28.6 $\pm$ 5.4                   | 28.7 $\pm$ 5.6                         | 0.9830         |
| Smoking status, n (%)                     |                                |                                  |                                        | 0.0045         |
| Never                                     | 759 (47.2)                     | 473 (44.3)                       | 286 (52.9)                             |                |
| Former                                    | 740 (46.0)                     | 516 (48.3)                       | 224 (41.4)                             |                |
| Current                                   | 110 (6.8)                      | 79 (7.4)                         | 31 (5.7)                               |                |
| Pack years smoked                         | 0 (0, 12.4)                    | 0 (0, 14)                        | 0 (0, 8.1)                             | 0.0001         |
| Current alcohol use, n (%)                | 690 (42.9)                     | 457 (42.8)                       | 233 (43.1)                             | 0.9152         |
| Lipid lowering medication use, n (%)      | 612 (37.9)                     | 464 (43.2)                       | 148 (27.3)                             | <0.0001        |
| HMG-CoA Reductase (statin) use, n (%)     | 581 (36.0)                     | 443 (41.3)                       | 138 (25.5)                             | <0.0001        |
| Antihypertensive use, n (%)               | 873 (54.1)                     | 639 (59.6)                       | 234 (43.2)                             | <0.0001        |
| Presence of hypertension, n (%)           | 973 (60.3)                     | 709 (66.1)                       | 264 (48.7)                             | <0.0001        |
| Presence of diabetes, n (%)               | 352 (22.1)                     | 263 (24.9)                       | 89 (16.6)                              | 0.0002         |
| Serum total cholesterol, mg/dL            | 183.9 $\pm$ 36.2               | 183.1 $\pm$ 36.1                 | 185.6 $\pm$ 36.4                       | 0.1735         |
| Serum low-density lipoprotein, mg/dL      | 106.4 $\pm$ 32.0               | 105.4 $\pm$ 32.1                 | 108.4 $\pm$ 31.8                       | 0.0819         |
| Serum high-density lipoprotein, mg/dL     | 55.8 $\pm$ 16.4                | 55.5 $\pm$ 16.6                  | 56.4 $\pm$ 16.1                        | 0.1633         |
| Serum triglyceride, mg/dL                 | 110.0 $\pm$ 61.8               | 112.4 $\pm$ 64.1                 | 105.2 $\pm$ 56.7                       | 0.0206         |
| Self-reported snoring, n (%)              |                                |                                  |                                        | 0.2587         |
| None habitual snorer (1-2<br>nights/week) | 449 (28.0)                     | 288 (27.1)                       | 161 (29.7)                             |                |
| Habitual snorer (3-7<br>nights/week)      | 644 (40.1)                     | 422 (39.7)                       | 222 (41.0)                             |                |
| Unknown                                   | 512 (31.9)                     | 353 (33.2)                       | 159 (29.3)                             |                |
| <b>Carotid ultrasound measures</b>        |                                |                                  |                                        |                |
| Mean common carotid intima-               |                                |                                  |                                        |                |

|                                                                 |                                    |                                     |                                     |         |
|-----------------------------------------------------------------|------------------------------------|-------------------------------------|-------------------------------------|---------|
| media thickness, mm<br>Mean $\pm$ SD<br>Median [IQR]            | 0.86 (0.20)<br>0.82 [0.73, 0.96]   | 0.89 $\pm$ 0.2<br>0.86 [0.75, 0.99] | 0.80 $\pm$ 0.2<br>0.77 [0.69, 0.88] | <0.0001 |
| <b>Polysomnography sleep measures</b>                           |                                    |                                     |                                     |         |
| Total sleep duration, min                                       | 360.8 $\pm$ 81.8                   | 358.7 $\pm$ 84.3                    | 365.1 $\pm$ 76.4                    | 0.1337  |
| Sleep maintenance efficiency, %                                 | 79.7 $\pm$ 12.6                    | 78.9 $\pm$ 12.9                     | 81.3 $\pm$ 11.9                     | <0.0001 |
| Apnea-hypopnea index, events/h<br>Mean $\pm$ SD<br>Median [IQR] | 14.5 $\pm$ 16.4<br>9.0 [3.3, 19.2] | 15.0 $\pm$ 16.4<br>9.4 [3.5, 19.6]  | 13.6 $\pm$ 16.1<br>7.8 [2.6, 18.0]  | 0.0178  |
| Apnea-hypopnea index $\geq$ 15, n (%)                           | 531 (32.9)                         | 373 (34.8)                          | 158 (29.2)                          | 0.023   |
| Arousal index, events/h                                         | 22.0 $\pm$ 11.9                    | 22.6 $\pm$ 12.0                     | 20.8 $\pm$ 11.7                     | 0.0008  |
| Sleep time in stage 1 sleep, %                                  | 14.2 $\pm$ 8.9                     | 14.9 $\pm$ 9.1                      | 12.9 $\pm$ 8.2                      | <0.0001 |
| Sleep time in stage 2 sleep, %                                  | 57.6 $\pm$ 10.1                    | 57.4 $\pm$ 10.1                     | 57.8 $\pm$ 10.0                     | 0.5799  |
| Sleep time in stage 3 and 4 sleep, %                            | 10.2 $\pm$ 9.0                     | 10.1 $\pm$ 8.9                      | 10.4 $\pm$ 9.0                      | 0.4014  |
| Sleep time in REM sleep, %                                      | 18.1 $\pm$ 6.7                     | 17.6 $\pm$ 6.7                      | 19.0 $\pm$ 6.7                      | 0.0003  |
| Sleep time with SpO <sub>2</sub> <90%, %                        | 0.64 [0.1, 3.1]                    | 0.73 [0.1, 3.3]                     | 0.5 [0.0, 2.7]                      | 0.0068  |
| Average SpO <sub>2</sub> in sleep, %                            | 94.3 $\pm$ 1.7                     | 94.3 $\pm$ 1.8                      | 94.5 $\pm$ 1.6                      | 0.0079  |

Data are presented as number (%), mean  $\pm$  SD, or median [IQR].

P values for continuous data are from Wilcoxon rank sum test. P values for categorical data are from a chi-square test.

AHI indicates apnea hypopnea index; BMI, body mass index; IQR, interquartile range; REM, rapid eye movement sleep; SD, standard deviation; and SpO<sub>2</sub>, oxygen saturation.

**Table II: Sex-Specific Association between Sleep Apnea, Arousal Index, and the Presence of Carotid Plaque**

|                                 | Model 1          |               | Model 2          |               | Model 3          |               |
|---------------------------------|------------------|---------------|------------------|---------------|------------------|---------------|
|                                 | OR [95% CI]      | <i>P</i> -int | OR [95% CI]      | <i>P</i> -int | OR [95% CI]      | <i>P</i> -int |
| <b>SA (AHI ≥15 events/h)</b>    |                  |               |                  |               |                  |               |
| Male                            | 1.37 [0.99,1.91] | 0.467         | 1.34 [0.96,1.88] | 0.377         | 1.29 [0.92,1.83] | 0.356         |
| Female                          | 1.15 [0.81,1.62] |               | 1.08 [0.75,1.55] |               | 1.03 [0.71,1.48] |               |
| <b>Arousal index (events/h)</b> |                  |               |                  |               |                  |               |
| Male                            | 1.01 [1.00,1.02] | 0.999         | 1.01 [0.99,1.02] | 0.946         | 1.01 [1.00,1.02] | 0.638         |
| Female                          | 1.01 [0.99,1.02] |               | 1.01 [0.99,1.02] |               | 1.01 [0.99,1.02] |               |

†Model 1: adjusted for demographics (continuous age, sex, and race/ethnicity) and interaction term between sex and sleep parameter.

Model 2: additionally adjusted for pack-years smoked and body mass index

Model 3: additionally adjusted for alcohol use, presence of hypertension and diabetes mellitus, serum total cholesterol, serum triglyceride level, HMG-CoA reductase (statin) use.

AHI indicates apnea hypopnea index; OR, odds ratio; SA, sleep apnea; and SpO<sub>2</sub>, oxygen saturation.

**Table III: Race/Ethnicity-Specific Association between Sleep Apnea, Arousal Index, and the Presence of Carotid Plaque**

|                                 | Model 1          |               | Model 2          |               | Model 3           |               |
|---------------------------------|------------------|---------------|------------------|---------------|-------------------|---------------|
|                                 | OR [95% CI]      | <i>P</i> -int | OR [95% CI]      | <i>P</i> -int | OR [95% CI]       | <i>P</i> -int |
| <b>SA (AHI ≥15 events/h)</b>    |                  |               |                  |               |                   |               |
| White                           | 1.65 [1.06,2.56] | 0.195         | 1.55 [0.99,2.45] | 0.238         | 1.50 [0.94, 2.38] | 0.278         |
| Chinese                         | 1.09 [0.60,2.00] |               | 1.07 [0.58,1.97] |               | 1.09 [0.59, 2.01] |               |
| Black                           | 1.47 [0.94,2.31] |               | 1.43 [0.91,2.26] |               | 1.32 [0.82, 2.11] |               |
| Hispanic                        | 0.87 [0.56,1.37] |               | 0.85 [0.54,1.35] |               | 0.82 [0.51, 1.30] |               |
| <b>Arousal index (events/h)</b> |                  |               |                  |               |                   |               |
| White                           | 1.01 [0.99,1.03] | 0.681         | 1.01 [0.99,1.03] | 0.771         | 1.01 [0.99,1.03]  | 0.588         |
| Chinese                         | 1.00 [0.97,1.03] |               | 1.00 [0.97,1.02] |               | 0.99 [0.97,1.02]  |               |
| Black                           | 1.02 [1.00,1.03] |               | 1.01 [1.00,1.03] |               | 1.02 [1.00,1.04]  |               |
| Hispanic                        | 1.00 [0.99,1.02] |               | 1.00 [0.99,1.02] |               | 1.01 [0.99,1.02]  |               |

†Model 1: adjusted for demographics (continuous age, sex, race/ethnicity) and interaction term between race/ethnicity and sleep parameter.

Model 2: additionally adjusted for pack-years smoked and body mass index

Model 3: additionally adjusted for alcohol use, presence of hypertension and diabetes mellitus, serum total cholesterol, serum triglyceride level, HMG-CoA reductase (statin) use.

AHI indicates apnea hypopnea index; OR, odds ratio; SA, sleep apnea; and SpO<sub>2</sub>, oxygen saturation.



**Table IV: Sex-Specific Association between Sleep Apnea, Arousal Index, and Carotid Intima-Media Thickness**

|                                               |        | Model 1              |               | Model 2              |               | Model 3              |               |
|-----------------------------------------------|--------|----------------------|---------------|----------------------|---------------|----------------------|---------------|
|                                               |        | $\beta \pm SE$       | <i>P</i> -int | $\beta \pm SE$       | <i>P</i> -int | $\beta \pm SE$       | <i>P</i> -int |
| <b>SA (AHI <math>\geq 15</math> events/h)</b> |        |                      |               |                      |               |                      |               |
|                                               | Male   | 0.0035 $\pm$ 0.0132  | 0.411         | -0.0076 $\pm$ 0.0133 | 0.551         | -0.0115 $\pm$ 0.0133 | 0.437         |
|                                               | Female | 0.0194 $\pm$ 0.0142  |               | 0.0039 $\pm$ 0.0146  |               | 0.0036 $\pm$ 0.0146  |               |
| <b>Arousal index (events/h)</b>               |        |                      |               |                      |               |                      |               |
|                                               | Male   | -0.0001 $\pm$ 0.0005 | 0.200         | -0.0003 $\pm$ 0.0005 | 0.225         | -0.0003 $\pm$ 0.0005 | 0.341         |
|                                               | Female | 0.0009 $\pm$ 0.0006  |               | 0.0006 $\pm$ 0.0006  |               | 0.0005 $\pm$ 0.0006  |               |

†Model 1: adjusted for demographics (continuous age, sex, race/ethnicity) and interaction term between sex and sleep parameter.

Model 2: additionally adjusted for pack-years smoked and body mass index

Model 3: additionally adjusted for alcohol use, presence of hypertension and diabetes mellitus, serum total cholesterol, serum triglyceride level, HMG-CoA reductase (statin) use.

AHI indicates apnea hypopnea index; SA, sleep apnea; and SpO<sub>2</sub>, oxygen saturation.

**Table V: Race/Ethnicity-Specific Association between Sleep Apnea, Arousal Index, and Carotid Intima-Media Thickness**

|                                                                                           | <b>Model 1</b>       |               | <b>Model 2</b>        |               | <b>Model 3</b>       |               |
|-------------------------------------------------------------------------------------------|----------------------|---------------|-----------------------|---------------|----------------------|---------------|
|                                                                                           | $\beta \pm SE$       | <i>P</i> -int | $\beta \pm SE$        | <i>P</i> -int | $\beta \pm SE$       | <i>P</i> -int |
| <b>SA (AHI <math>\geq 15</math> events/h)</b>                                             |                      |               |                       |               |                      |               |
| White                                                                                     | 0.0035 $\pm$ 0.0164  | 0.558         | -0.0102 $\pm$ 0.0166  | 0.560         | -0.0166 $\pm$ 0.0167 | 0.447         |
| Chinese                                                                                   | -0.0042 $\pm$ 0.0254 |               | -0.0139 $\pm$ 0.0252  |               | -0.0133 $\pm$ 0.0252 |               |
| Black                                                                                     | 0.0330 $\pm$ 0.0185  |               | 0.0199 $\pm$ 0.0186   |               | 0.0207 $\pm$ 0.0187  |               |
| Hispanic                                                                                  | 0.0056 $\pm$ 0.0186  |               | -0.0092 $\pm$ 0.0188  |               | -0.0106 $\pm$ 0.0187 |               |
| <b>Arousal index (events/h)</b>                                                           |                      |               |                       |               |                      |               |
| White                                                                                     | -0.0002 $\pm$ 0.0006 | 0.109         | -0.0005 $\pm$ 0.0006  | 0.140         | -0.0007 $\pm$ 0.0006 | 0.113         |
| Chinese                                                                                   | 0.0014 $\pm$ 0.0011  |               | 0.0011 $\pm$ 0.0011   |               | 0.0009 $\pm$ 0.0011  |               |
| Black                                                                                     | 0.0016 $\pm$ 0.0008  |               | 0.0013 $\pm$ 0.0008   |               | 0.0014 $\pm$ 0.0008  |               |
| Hispanic                                                                                  | -0.0005 $\pm$ 0.0007 |               | -0.0006 $\pm$ 0.0007  |               | -0.0006 $\pm$ 0.0007 |               |
| <b>Sleep maintenance efficiency (%)</b>                                                   |                      |               |                       |               |                      |               |
| White                                                                                     | -0.0008 $\pm$ 0.0007 | 0.131         | -0.0005 $\pm$ 0.0006  | 0.045         | -0.0003 $\pm$ 0.0007 | 0.040         |
| Chinese                                                                                   | -0.0003 $\pm$ 0.0010 |               | -0.00009 $\pm$ 0.0009 |               | 0.00006 $\pm$ 0.0010 |               |
| Black                                                                                     | -0.0011 $\pm$ 0.0007 |               | -0.0010 $\pm$ 0.0007  |               | -0.0011 $\pm$ 0.0006 |               |
| Hispanic                                                                                  | 0.0010 $\pm$ 0.0007  |               | 0.0016 $\pm$ 0.0007   |               | 0.0016 $\pm$ 0.0007  |               |
| <b><math>\geq 0.64\%</math> Sleep time with SpO<sub>2</sub> <math>&lt; 90\%</math>, %</b> |                      |               |                       |               |                      |               |
| White                                                                                     | 0.0106 $\pm$ 0.0148  | 0.027         | -0.0058 $\pm$ 0.0152  | 0.036         | -0.0086 $\pm$ 0.0153 | 0.033         |
| Chinese                                                                                   | 0.0122 $\pm$ 0.0247  |               | 0.0019 $\pm$ 0.0245   |               | 0.0002 $\pm$ 0.0246  |               |
| Black                                                                                     | 0.0627 $\pm$ 0.0168  |               | 0.0497 $\pm$ 0.0170   |               | 0.0485 $\pm$ 0.0170  |               |
| Hispanic                                                                                  | -0.0073 $\pm$ 0.0181 |               | -0.0137 $\pm$ 0.0184  |               | -0.0145 $\pm$ 0.0183 |               |

†Model 1: adjusted for demographics (continuous age, sex, and race/ethnicity) and interaction term between race/ethnicity and sleep parameter.

Model 2: additionally adjusted for pack-years smoked and body mass index

Model 3: additionally adjusted for alcohol use, presence of hypertension and diabetes mellitus, serum total cholesterol, serum triglyceride level, HMG-CoA reductase (statin) use.

AHI indicates apnea hypopnea index; SA, sleep apnea; and SpO<sub>2</sub>, oxygen saturation.

**Table VI: P-interactions between Demographics and Sleep Measures in Predicting Carotid Plaque Presence**

|                                                                          | Model 1 |       |                | Model 2 |       |                | Model 3 |       |                |
|--------------------------------------------------------------------------|---------|-------|----------------|---------|-------|----------------|---------|-------|----------------|
|                                                                          | Age     | Sex   | Race/Ethnicity | Age     | Sex   | Race/Ethnicity | Age     | Sex   | Race/Ethnicity |
| <b>SA (AHI <math>\geq</math>15 events/h)</b>                             | 0.064   | 0.467 | 0.195          | 0.105   | 0.377 | 0.238          | 0.078   | 0.356 | 0.278          |
| <b>Arousal index (events/h)</b>                                          | 0.252   | 0.999 | 0.681          | 0.404   | 0.946 | 0.771          | 0.264   | 0.638 | 0.588          |
| <b><math>\geq</math>0.64% Sleep time with SpO<sub>2</sub> &lt;90%, %</b> | 0.086   | 0.427 | 0.770          | 0.119   | 0.265 | 0.875          | 0.127   | 0.195 | 0.880          |

†Model 1: adjusted for demographics (age, sex, and race/ethnicity) and interaction term between demographic variable and sleep parameter. Age was modelled continuously when sex and race/ethnicity were tested for effect modification.

Model 2: additionally adjusted for pack-years smoked and body mass index

Model 3: additionally adjusted for alcohol use, presence of hypertension and diabetes mellitus, serum total cholesterol, serum triglyceride level, HMG-CoA reductase (statin) use.

AHI indicates apnea hypopnea index; SA, sleep apnea; and SpO<sub>2</sub>, oxygen saturation.

**Table VII: P-interactions between Demographics and Sleep Measures in Predicting Carotid Intima-Media Thickness**

|                                                                          | Model 1 |       |                | Model 2 |       |                | Model 3 |       |                |
|--------------------------------------------------------------------------|---------|-------|----------------|---------|-------|----------------|---------|-------|----------------|
|                                                                          | Age     | Sex   | Race-ethnicity | Age     | Sex   | Race-ethnicity | Age     | Sex   | Race-ethnicity |
| <b>SA (AHI <math>\geq</math>15 events/h)</b>                             | 0.041   | 0.411 | 0.558          | 0.058   | 0.551 | 0.560          | 0.072   | 0.437 | 0.447          |
| <b>Arousal index (events/hr)</b>                                         | 0.389   | 0.200 | 0.109          | 0.641   | 0.225 | 0.140          | 0.499   | 0.341 | 0.113          |
| <b>Sleep maintenance efficiency (%)</b>                                  | 0.810   | 0.672 | 0.131          | 0.774   | 0.565 | 0.045          | 0.653   | 0.639 | 0.040          |
| <b><math>\geq</math>0.64% Sleep time with SpO<sub>2</sub> &lt;90%, %</b> | 0.045   | 0.977 | 0.027          | 0.089   | 0.666 | 0.036          | 0.106   | 0.744 | 0.033          |

†Model 1: adjusted for demographics (age, sex, and race/ethnicity) and interaction term between demographic variable and sleep parameter. Age was modelled continuously when sex and race/ethnicity were tested for effect modification.

Model 2: additionally adjusted for pack-years smoked and body mass index

Model 3: additionally adjusted for alcohol use, presence of hypertension and diabetes mellitus, serum total cholesterol, serum triglyceride level, HMG-CoA reductase (statin) use.

AHI indicates apnea hypopnea index; SA, sleep apnea; and SpO<sub>2</sub>, oxygen saturation.
